# Supplementary material
Source: Springer Nature journal article supplement (https://www.springermedizin.de/resource/supplementary/12967_2011_1078_MOESM4_ESM.pdf/9573664)
Supplement: MOESM4 [file 9573664]

A

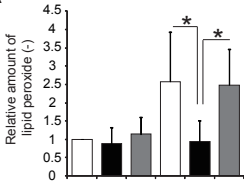

| Hemolysate pre-treated |     |     |     | Sal | Tre | Mal |
|------------------------|-----|-----|-----|-----|-----|-----|
|                        | Sal | Tre | Mal | Sal | Tre | Mal |
| Vehicle                | Sal | Tre | Mal |     |     |     |
| Medium                 | Sal | Tre | Mal | Sal | Tre | Mal |

B

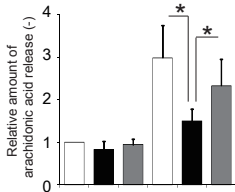

| Medium | Vehicle |     |     | 1.5 mM H <sub>2</sub> O <sub>2</sub> |     |     |
|--------|---------|-----|-----|--------------------------------------|-----|-----|
|        | Sal     | Tre | Mal | Sal                                  | Tre | Mal |
|        | Sal     | Tre | Mal | Sal                                  | Tre | Mal |
